# Supplementary material
Source: publisher site journal article supplement (https://www.dovepress.com/article/126605)
Supplement: Supplementary file 1 [file get_supplementary_file.php]

## Supplementary Materials

### Methods: Subject inclusion and exclusion criteria

**Table S1** Subject inclusion and exclusion criteria

|                                                                                                                                                                                                                                                                                                                                                     |
|-----------------------------------------------------------------------------------------------------------------------------------------------------------------------------------------------------------------------------------------------------------------------------------------------------------------------------------------------------|
| <b>Inclusion criteria</b>                                                                                                                                                                                                                                                                                                                           |
| Subject signed and dated a written informed consent form                                                                                                                                                                                                                                                                                            |
| Subjects were aged $\geq 18$ years                                                                                                                                                                                                                                                                                                                  |
| Subjects had a clinician-confirmed diagnosis of IBS-D (mild, moderate, or severe) and symptoms for $\geq 6$ months prior to diagnosis                                                                                                                                                                                                               |
| Subjects had experienced recurrent abdominal pain or discomfort associated with at least two of the three following features for $\geq 3$ days a month, for the previous 3 months: (1) improvement with defecation; (2) onset associated with a change in frequency of stool; and (3) onset associated with a change in form (appearance) of stool. |
| Subjects must have experienced loose (mushy) or watery stools (Type 6 or 7 on the Bristol Stool Form Scale <sup>1,2</sup> ) in $\geq 25\%$ of bowel movements and hard or lumpy stool in $< 25\%$ of bowel movements in the absence of anti-diarrhea medication or laxative use, in the previous 3 months                                           |
| Subjects had to be fluent in English, and willing and able to participate in a face-to-face, 90-minute interview                                                                                                                                                                                                                                    |
| Subjects had to have a device (smartphone or tablet) with an Android or iOS operating system and be willing to download a mobile application or have it done for them                                                                                                                                                                               |
| <b>Exclusion criteria</b>                                                                                                                                                                                                                                                                                                                           |
| Subject had an organic disease or functional gastrointestinal syndrome, other than IBS-D, potentially affecting the digestive tract passage or colonic function, including structure, obstruction, or ileus                                                                                                                                         |

|                                                                                                                                                                                                                                                                                                                                                                                                                                                                                                                                                            |
|------------------------------------------------------------------------------------------------------------------------------------------------------------------------------------------------------------------------------------------------------------------------------------------------------------------------------------------------------------------------------------------------------------------------------------------------------------------------------------------------------------------------------------------------------------|
| Subject had bowel movement characterized as an Astellas Stool Scale Form <sup>3</sup> ≤3 in the previous 7 days                                                                                                                                                                                                                                                                                                                                                                                                                                            |
| Subject had benign polyps or colonic diverticulosis judged to have an influence on the digestive tract passage or colonic function                                                                                                                                                                                                                                                                                                                                                                                                                         |
| Subject had a history of surgical resection of the stomach, small intestine, or large intestine (excluding resection of appendix or benign polyps)                                                                                                                                                                                                                                                                                                                                                                                                         |
| Subject had a history of ischemic colitis                                                                                                                                                                                                                                                                                                                                                                                                                                                                                                                  |
| Subject had a history of unexplained blood passage from the rectum                                                                                                                                                                                                                                                                                                                                                                                                                                                                                         |
| Subject had uncontrolled lactose intolerance, or was receiving radiotherapy for abdominal disease                                                                                                                                                                                                                                                                                                                                                                                                                                                          |
| Subject had cardiovascular, pulmonary, endocrine, metabolic, hematological, neurologic, or gastrointestinal (excluding IBS-D) disease                                                                                                                                                                                                                                                                                                                                                                                                                      |
| Subject had a history of thyroid dysfunction                                                                                                                                                                                                                                                                                                                                                                                                                                                                                                               |
| Subject had any condition or situation that would put the subject at significant risk, could confound the study results, or could interfere significantly with the subject's involvement in the study                                                                                                                                                                                                                                                                                                                                                      |
| Subject had a cognitive impairment or disorder that would interfere with his or her ability to participate in a face-to-face interview                                                                                                                                                                                                                                                                                                                                                                                                                     |
| <b>References:</b> <ol style="list-style-type: none"> <li>1. Lewis SJ, Heaton KW. Stool form scale as a useful guide to intestinal transit time. <i>Scand J Gastroenterol</i>. 1997;32(9):920-924.</li> <li>2. Heaton K. Understanding your bowels. 3rd ed. Banbury, UK Family Doctor Publications 1999.</li> <li>3. Lasch K, Delgado-Herrera L, Tesler Waldman L, et al. Development of a new instrument to assess stool form and consistency in irritable bowel syndrome with diarrhea. <i>Gastroenterol Hepatol: Open Access</i>. 2016;4(1).</li> </ol> |

## Methods: Recruitment targets

**Table S2** Recruitment targets

| Patient characteristics |                        | Target, n (%) |
|-------------------------|------------------------|---------------|
| Severity of disease     | Mild                   | 8–9 (~33)     |
|                         | Moderate               | 8–9 (~33)     |
|                         | Severe                 | 8–9 (~33)     |
| Age                     | 18–64 years            | 20 (80)       |
|                         | ≥65 years              | 5 (20)        |
| Sex                     | Male                   | 10 (40)       |
|                         | Female                 | 15 (60)       |
| Education               | High school or less    | 10 (40)       |
|                         | Some college or higher | 15 (60)       |
| Race                    | Caucasian              | 15 (60)       |
|                         | Non-Caucasian          | 10 (40)       |
| Electronic device       | Android                | 13 (~50)      |
|                         | iOS                    | 13 (~50)      |

## Interim results

Subjects in wave 1 (n=7), wave 2 (n=8), wave 3 (n=10) interviews reported no issues with interpreting the items similarly between the pen-and-paper and mobile application formats. However, subjects reported some difficulty with interpreting items in the Report History section of the mobile application (**Tables S3, S4, and S5** for waves 1, 2, and 3, respectively). Modifications made after wave 1 and 2 interviews are also presented in **Tables S3 and S4**, respectively).

**Table S3** Summary results for wave 1 (n=7), along with modifications made to the mobile application

|                                          | Heading                                             | Interview summary                                                                                                                                                                                                                                                                                                                                                                                                                                                                                                                                                                                                                                                                                                                                                                                 | Modifications made                                                    |
|------------------------------------------|-----------------------------------------------------|---------------------------------------------------------------------------------------------------------------------------------------------------------------------------------------------------------------------------------------------------------------------------------------------------------------------------------------------------------------------------------------------------------------------------------------------------------------------------------------------------------------------------------------------------------------------------------------------------------------------------------------------------------------------------------------------------------------------------------------------------------------------------------------------------|-----------------------------------------------------------------------|
| IBS-D Daily Symptom Diary Report History | '# of times passed gas past week' chart and summary | <ul style="list-style-type: none"> <li>Overall, subjects misinterpreted the vertical axis of the chart as number of times gas passed rather than the categorized frequency of episodes of passing gas in the past week (ie, 4=all of the time, 3=most of the time, 2=some of the time, 1=a little of the time, 0=none of the time)</li> <li>Specifically, misinterpreted: <ul style="list-style-type: none"> <li>Chart vertical axis as representing the number of episodes of passing gas (n=2)</li> <li>Number of times passed gas on Wednesday on chart as referring to the number of episodes of passed gas rather than 'some of the time' (n=5)</li> <li>Results in chart summary as referring to the number of episodes of passed gas rather than 'some of the time'</li> </ul> </li> </ul> | Heading revised to: 'How often passed gas past week'                  |
|                                          | '# of accidents past week' chart                    | <ul style="list-style-type: none"> <li>Overall, subjects could not tell the number of days with accidents represented by the pie chart as they did not understand that the chart represented the number of days with and without accidents</li> <li>Additionally, interpreted the chart as number of accidents in the past week (n=2)</li> </ul>                                                                                                                                                                                                                                                                                                                                                                                                                                                  | Chart to display the actual number of days with and without accidents |
|                                          | 'Total IBS-D pain, cramping,                        | <ul style="list-style-type: none"> <li>Overall, subjects expressed confusion and difficulty understanding the composite score</li> </ul>                                                                                                                                                                                                                                                                                                                                                                                                                                                                                                                                                                                                                                                          | Heading revised to: 'Summary of IBS-D symptoms (pain,                 |

|                                 |                                                                                   |                                                                                                                                                                                                                                                                                                                                                                                                      |                                                                                                                                                                                              |
|---------------------------------|-----------------------------------------------------------------------------------|------------------------------------------------------------------------------------------------------------------------------------------------------------------------------------------------------------------------------------------------------------------------------------------------------------------------------------------------------------------------------------------------------|----------------------------------------------------------------------------------------------------------------------------------------------------------------------------------------------|
|                                 | and pressure score over the past week' chart                                      | <ul style="list-style-type: none"> <li>Subjects misinterpreted:               <ul style="list-style-type: none"> <li>Composite score as an average of all the previous charts/questions (n=2)</li> <li>Their pain tolerance level (n=1)</li> <li>Number of days with symptoms (n=1)</li> </ul> </li> </ul>                                                                                           | cramping, and pressure) over the past week'                                                                                                                                                  |
|                                 | 'Total IBS-D pain, cramping, and pressure score over the past week' chart summary | <ul style="list-style-type: none"> <li>Overall, subjects expressed confusion as to the meaning of the 'total score' in the summary</li> <li>Subjects misinterpreted:               <ul style="list-style-type: none"> <li>Total score as an average of all the previous questions (n=1)</li> <li>Their pain tolerance level (n=1)</li> <li>Could not provide a response (n=1)</li> </ul> </li> </ul> | Heading revised to:<br>'Summary of IBS-D symptoms (pain, cramping, and pressure) over the past week'<br>Summary screen to indicate that the summary score is a rating out of 10 (ie, '6/10') |
| IBS-D Symptom Event Log         | '# of bowel movements today'                                                      | <ul style="list-style-type: none"> <li>Difficulty in interpreting 24-hour time format (n=2)</li> </ul>                                                                                                                                                                                                                                                                                               | Revised summary screen to display time in 12-hour clock format                                                                                                                               |
| Report History                  | 'Immediacy of need today' chart                                                   | <ul style="list-style-type: none"> <li>Difficulty in interpreting the vertical axis of the chart (n=1)</li> </ul>                                                                                                                                                                                                                                                                                    |                                                                                                                                                                                              |
|                                 | 'Immediacy of need today' summary                                                 | <ul style="list-style-type: none"> <li>Difficulty interpreting the average immediacy of need number (n=1)</li> </ul>                                                                                                                                                                                                                                                                                 |                                                                                                                                                                                              |
| Usability of mobile application |                                                                                   | <ul style="list-style-type: none"> <li>Overall, subjects found the mobile application easy to use</li> <li>Difficulty downloading and/or installing the application onto their mobile devices (n=4)</li> </ul>                                                                                                                                                                                       |                                                                                                                                                                                              |

|  |  |                                                                                                                                                                                                                                                                                                                                                                                                               |  |
|--|--|---------------------------------------------------------------------------------------------------------------------------------------------------------------------------------------------------------------------------------------------------------------------------------------------------------------------------------------------------------------------------------------------------------------|--|
|  |  | <ul style="list-style-type: none"><li>• On some screens the font size was small, making it difficult to read clearly (n=2)</li><li>• Suggestion that the mobile application buttons could be made to stand out more clearly (n=1)</li><li>• Difficulty in knowing which questionnaire section was referred to by the 'Daily Symptom Diary' and 'Symptom Event Log' mobile application buttons (n=1)</li></ul> |  |
|--|--|---------------------------------------------------------------------------------------------------------------------------------------------------------------------------------------------------------------------------------------------------------------------------------------------------------------------------------------------------------------------------------------------------------------|--|

**Table S4** Summary results for wave 2 (n=8), along with modifications made to the mobile application

|                                          | Heading                                                                             | Interview summary                                                                                                                                                                                                                                                                                                      | Modifications made                                                                                                                                                |
|------------------------------------------|-------------------------------------------------------------------------------------|------------------------------------------------------------------------------------------------------------------------------------------------------------------------------------------------------------------------------------------------------------------------------------------------------------------------|-------------------------------------------------------------------------------------------------------------------------------------------------------------------|
| IBS-D Daily Symptom Diary Report History | '# of times passed gas past week' summary screen                                    |                                                                                                                                                                                                                                                                                                                        | 'How often passed gas past week'                                                                                                                                  |
|                                          | '# of accidents past week' chart                                                    | <ul style="list-style-type: none"> <li>Overall, subjects expressed hesitation in telling the number of days with accidents represented by the pie chart.</li> <li>Additionally, interpreted chart as number of accidents in the past week rather than number of days with accidents in the past week (n=2).</li> </ul> | '# of days with accidents past week'                                                                                                                              |
|                                          | '# of accidents past week' summary screen                                           | <ul style="list-style-type: none"> <li>Misinterpreted the summary as reporting the number of accidents in the past week rather than the number of days with accidents (n=2)</li> </ul>                                                                                                                                 | '# of days with accidents past week' and added the word 'days' to the right of the number in the circle at the top of the screen                                  |
|                                          | 'Summary of IBS-D symptoms (pain, cramping, and pressure) over the past week' chart | <ul style="list-style-type: none"> <li>Misinterpreted the composite score as an average of all the previous charts/questions (n=3)</li> </ul>                                                                                                                                                                          | Revised headings to 'Average severity of IBS-D pain, cramping, and pressure over the past week' and added the word 'severe' to the key at the bottom of the chart |



|                                 |                                                                                                    |                                                                                                                                                                                                                                                                                                                                                                                                                          |                                                                                                                                                                                                                                                                                           |
|---------------------------------|----------------------------------------------------------------------------------------------------|--------------------------------------------------------------------------------------------------------------------------------------------------------------------------------------------------------------------------------------------------------------------------------------------------------------------------------------------------------------------------------------------------------------------------|-------------------------------------------------------------------------------------------------------------------------------------------------------------------------------------------------------------------------------------------------------------------------------------------|
|                                 | <p>Summary of IBS-D Symptoms (pain, cramping, and pressure) over the past week' summary screen</p> | <ul style="list-style-type: none"> <li>• Misinterpreted the total score as:             <ul style="list-style-type: none"> <li>– Percentage of time in which they experienced symptoms (n=1)</li> <li>– Number of symptoms experienced (n=1)</li> <li>– Average of all of all the previous charts/questions (n=1)</li> </ul> </li> </ul>                                                                                 | <p>Revised headings to 'Average severity of IBS-D pain, cramping, and pressure over the past week' and added the word 'severe' to the key at the bottom of the summary screen.</p> <p>Revised the summary screen so that the key for the 0 to 10 rating appears directly below '6/10'</p> |
| Usability of mobile application |                                                                                                    | <ul style="list-style-type: none"> <li>• Overall, subjects found the mobile application easy to use.</li> <li>• Difficulty downloading and/or installing the application onto their mobile devices (n=4)</li> <li>• Font size was small, making it difficult to read clearly (n=4)</li> <li>• 'Back' buttons on the mobile application screens were too small and did not work as intended when pressed (n=1)</li> </ul> |                                                                                                                                                                                                                                                                                           |

**Table S5** Summary results for wave 3 (n=10)

|                                          | Heading                                                                           | Interview summary                                                                                                                                                                                                                                                                                                                                                                                                                                                                                  |
|------------------------------------------|-----------------------------------------------------------------------------------|----------------------------------------------------------------------------------------------------------------------------------------------------------------------------------------------------------------------------------------------------------------------------------------------------------------------------------------------------------------------------------------------------------------------------------------------------------------------------------------------------|
| General                                  |                                                                                   | <ul style="list-style-type: none"> <li>Subjects were unable to identify which questionnaire results they would be viewing if they selected 'Daily Symptom Diary' or 'Symptom Event Log' (n=7)</li> </ul>                                                                                                                                                                                                                                                                                           |
| IBS-D Daily Symptom Diary Report History | 'Severity of abdominal pain past week' chart                                      | <ul style="list-style-type: none"> <li>Misinterpreted the vertical axis and point on the chart as the days of the week rather than severity (n=2)</li> </ul>                                                                                                                                                                                                                                                                                                                                       |
|                                          | 'Severity of abdominal pain past week' summary screen                             | <ul style="list-style-type: none"> <li>Misinterpreted the summary screen as the day of the week rather than severity (n=2)</li> </ul>                                                                                                                                                                                                                                                                                                                                                              |
|                                          | 'How often passed gas past week' chart and summary screen                         | <ul style="list-style-type: none"> <li>Overall, subjects misinterpreted the vertical axis of the chart as the number of episodes of passed gas rather than the categorized frequency of episodes of passing gas in the past week (ie, 4=all of the time, 3=most of the time, 2=some of the time, 1=a little of the time, 0=none of the time)</li> <li>Misinterpreted results in the chart summary as referring to number of episodes of passed gas rather than 'some of the time' (n=4)</li> </ul> |
|                                          | '# of days with accidents past week' chart and summary screen                     | <ul style="list-style-type: none"> <li>Overall, subjects could not tell the number of days with accidents represented by the pie chart as they did not understand that the chart and summary represented the number of days with and without accidents</li> </ul>                                                                                                                                                                                                                                  |
|                                          | 'Average severity of IBS-D pain, cramping, and pressure over the past week' chart | <p>Overall, subjects continued to express confusion and difficulty understanding the composite score.</p> <p>Misinterpreted the composite score as:</p> <ul style="list-style-type: none"> <li>Average of all the previous charts/questions (n=1)</li> <li>Level of tolerance to the symptoms (n=1)</li> <li>Number of accidents in the previous week (n=1)</li> </ul>                                                                                                                             |

|                         |                                                                                            |                                                                                                                                                                                                                                                                                                                                                                                                                                                                                                                                                                                                                                                                         |
|-------------------------|--------------------------------------------------------------------------------------------|-------------------------------------------------------------------------------------------------------------------------------------------------------------------------------------------------------------------------------------------------------------------------------------------------------------------------------------------------------------------------------------------------------------------------------------------------------------------------------------------------------------------------------------------------------------------------------------------------------------------------------------------------------------------------|
|                         |                                                                                            | <ul style="list-style-type: none"> <li>– Average intensity and frequency of all the previous charts/questions (n=1)</li> </ul>                                                                                                                                                                                                                                                                                                                                                                                                                                                                                                                                          |
|                         | 'Average Severity of IBS-D pain, cramping, and Pressure over the past week' summary screen | <ul style="list-style-type: none"> <li>• Overall, subjects expressed confusion understanding the summary composite score.</li> <li>• Misinterpreted the summary score as:               <ul style="list-style-type: none"> <li>– Experiencing symptoms 6/10 days (n=3)</li> <li>– Average of either all the previous charts/questions (n=2) or only two of the previous charts/questions (n=2)</li> <li>– Experiencing symptoms 60% of the time, average level of symptom tolerance, number of episodes of cramping, or experiencing 6 out of 10 symptoms (n=1)</li> <li>– Unable to understand the meaning of the summary composite score (n=1)</li> </ul> </li> </ul> |
|                         | 'Past month' and 'past 3 months' charts                                                    | <ul style="list-style-type: none"> <li>• Misinterpreted the horizontal axis of the charts as the lowest level of the symptoms represented by the chart (n=3) or as the level of pain tolerance (n=1)</li> </ul>                                                                                                                                                                                                                                                                                                                                                                                                                                                         |
| IBS-D Symptom Event Log | '# of bowel movements today' chart                                                         | <ul style="list-style-type: none"> <li>• Misinterpreted the chart as bowel movement severity (n=1)</li> </ul>                                                                                                                                                                                                                                                                                                                                                                                                                                                                                                                                                           |
| Report History          | 'Bowel movement appearance today' chart and summary screen                                 | <ul style="list-style-type: none"> <li>• Overall, subjects misinterpreted the meaning of the vertical axis in the chart and the average shown on the summary screen.</li> <li>• Misinterpreted the vertical line in the chart as the quantity of bowel movements (n=2)</li> <li>• Misinterpreted the summary as representing bowel movement appearance over 5 days (n=1) or a week (n=1)</li> <li>• Unable to understand the meaning of the summary average bowel movement appearance (n=1)</li> </ul>                                                                                                                                                                  |
|                         | 'Feeling of complete                                                                       | <ul style="list-style-type: none"> <li>• Misinterpreted the chart as the number of bowel movements (n=1)</li> </ul>                                                                                                                                                                                                                                                                                                                                                                                                                                                                                                                                                     |

|                                       |                          |                                                                                                                                                                                                                                                                                                                                                                                                         |
|---------------------------------------|--------------------------|---------------------------------------------------------------------------------------------------------------------------------------------------------------------------------------------------------------------------------------------------------------------------------------------------------------------------------------------------------------------------------------------------------|
|                                       | emptying today'<br>chart |                                                                                                                                                                                                                                                                                                                                                                                                         |
| Usability of<br>mobile<br>application |                          | <ul style="list-style-type: none"> <li>• Overall, subjects found the mobile application easy to use.</li> <li>• Difficulty downloading and/or installing the application onto their mobile devices (n=4)</li> <li>• Font size was small, making it difficult to read clearly (n=3)</li> <li>• Font was difficult to read when on a gray background (as on a mobile application button) (n=1)</li> </ul> |

**Table S6** Interpretation of response options for conceptual equivalence across formats  
for the IBS-D Daily symptom Diary

|                                     | Response               | Conceptual equivalent, n % |       |         | Data not collected, n (%) |
|-------------------------------------|------------------------|----------------------------|-------|---------|---------------------------|
|                                     |                        | Yes                        | No    | Unclear |                           |
| Item 1:<br>Abdominal pain           | 0 – No                 | 24 (96)                    | 0 (0) | 1 (4)   | 0 (0)                     |
|                                     | 10 – Most severe       | 24 (96)                    | 0 (0) | 1 (4)   | 0 (0)                     |
| Item 2:<br>Abdominal cramps         | 0 – No                 | 23 (92)                    | 0 (0) | 2 (8)   | 0 (0)                     |
|                                     | 10 – Most severe       | 25 (100)                   | 0 (0) | 0 (0)   | 0 (0)                     |
| Item 3:<br>Abdominal pressure       | 0 – No                 | 24 (96)                    | 0 (0) | 1 (4)   | 0 (0)                     |
|                                     | 10 – Most severe       | 25 (100)                   | 0 (0) | 0 (0)   | 0 (0)                     |
| Item 4: Bloating severity           | 0 – Not bloated        | 24 (96)                    | 0 (0) | 1 (4)   | 0 (0)                     |
|                                     | 10 – Extremely bloated | 24 (96)                    | 0 (0) | 1 (4)   | 0 (0)                     |
| 5 Item:<br>Frequency of passing gas | None of the time       | 24 (96)                    | 0 (0) | 1 (4)   | 0 (0)                     |
|                                     | A little of the time   | 23 (92)                    | 0 (0) | 1 (4)   | 1 (4)                     |
|                                     | Some of the time       | 21 (84)                    | 0 (0) | 4 (16)  | 0 (0)                     |
|                                     | Most of the time       | 24 (96)                    | 0 (0) | 0 (0)   | 1 (4)                     |
|                                     | All of the time        | 24 (100)                   | 0 (0) | 1 (4)   | 0 (0)                     |
| Item 6:<br>Accidents                | Yes                    | 20 (80)                    | 0 (0) | 5 (20)  | 0 (0)                     |
|                                     | No                     | 23 (92)                    | 0 (0) | 2 (8)   | 0 (0)                     |

**Table S7** Interpretation of response options for conceptual equivalence across formats  
for the IBS-D Symptom Event Log

|                                         | Category                           | Conceptual equivalent, n % |       |         | Data not collected, n (%) |
|-----------------------------------------|------------------------------------|----------------------------|-------|---------|---------------------------|
|                                         |                                    | Yes                        | No    | Unclear |                           |
| Item 1: Date and time of bowel movement | –                                  | –                          | –     | –       | 25 (0)                    |
| Item 2: Immediacy of need               | No                                 | 23 (92)                    | 1 (4) | 1 (4)   | 0 (0)                     |
|                                         | Slight                             | 22 (88)                    | 0 (0) | 3 (12)  | 0 (0)                     |
|                                         | Moderate                           | 23 (92)                    | 0 (0) | 1 (4)   | 1 (4)                     |
|                                         | Quite a bit                        | 23 (92)                    | 0 (0) | 2 (8)   | 0 (0)                     |
|                                         | Extreme                            | 25 (100)                   | 0 (0) | 0 (0)   | 0 (0)                     |
| Item 3: Bowel movement appearance       | Like marbles or hard rocks         | 25 (100)                   | 0 (0) |         | 0 (0)                     |
|                                         | Single solid clumpy stool          | 24 (96)                    | 0 (0) | 1 (4)   | 0 (0)                     |
|                                         | Hard, solid formed, harder to pass | 24 (96)                    | 0 (0) | 1 (4)   | 0 (0)                     |
|                                         | Smooth, a softer stool             | 24 (96)                    | 0 (0) | 1 (4)   | 0 (0)                     |
|                                         | Soft chunks or clumps              | 24 (96)                    | 0 (0) | 1 (4)   | 0 (0)                     |
|                                         | Loose, mushy stool                 | 23 (92)                    | 0 (0) | 2 (8)   | 0 (0)                     |

|                                      |                  |          |       |       |       |
|--------------------------------------|------------------|----------|-------|-------|-------|
|                                      | Watery and muddy | 24 (96)  | 0 (0) | 1 (4) | 0 (0) |
|                                      | Just liquid      | 24 (96)  | 0 (0) | 1 (4) | 0 (0) |
| Item 4: Feeling of complete emptying | Yes              | 25 (100) | 0 (0) | 0 (0) | 0 (0) |
|                                      | No               | 25 (100) | 0 (0) | 0 (0) | 0 (0) |

**Notes:** Difference was not due to the type of format

**Table S8** Interpretation of the mobile application Report History for the IBS-D Daily symptom Diary

| Chart item                        | Interpretation parameter           | Interpretation as intended, n (%) |        |                   | Data not collected, n (%) |
|-----------------------------------|------------------------------------|-----------------------------------|--------|-------------------|---------------------------|
|                                   |                                    | Yes                               | No     | Insufficient data |                           |
| Item 1: Abdominal pain severity   | Horizontal axis (days of the week) | 25 (100)                          | 0 (0)  | 0 (0)             | 0 (0)                     |
|                                   | Vertical axis (severity)           | 24 (96)                           | 0 (0)  | 1 (4)             | 0 (0)                     |
|                                   | Data point on chart                | 24 (96)                           | 1 (4)  | 0 (0)             | 0 (0)                     |
|                                   | Summary screen                     | 22 (88)                           | 3 (12) | 0 (0)             | 0 (0)                     |
| Item 2: Abdominal cramps severity | Vertical axis (severity)           | 25 (100)                          | 0 (0)  | 0 (0)             | 0 (0)                     |
|                                   | Data point on chart                | 24 (96)                           | 1 (4)  | 0 (0)             | 0 (0)                     |
|                                   | Summary screen                     | 24 (96)                           | 1 (4)  | 0 (0)             | 0 (0)                     |
| Item 3: Abdominal pressure        | Vertical axis (severity)           | 24 (96)                           | 1 (4)  | 0 (0)             | 0 (0)                     |
|                                   | Summary screen                     | 23 (92)                           | 2 (8)  | 0 (0)             | 0 (0)                     |
| Item 4: Bloating severity         | Vertical axis (severity)           | 24 (96)                           | 0 (0)  | 1 (4)             | 0 (0)                     |
|                                   | Summary screen                     | 24 (96)                           | 1 (4)  | 0 (0)             | 0 (0)                     |
| Item 5: Frequency of passing gas  | Vertical axis (how often)          | 18 (72)                           | 6 (24) | 1 (4)             | 0 (0)                     |



|                                                                     |                                         |          |         |        |       |
|---------------------------------------------------------------------|-----------------------------------------|----------|---------|--------|-------|
|                                                                     | Data point on chart                     | 9 (36)   | 14 (56) | 1 (4)  | 1 (4) |
|                                                                     | Summary screen                          | 20 (80)  | 4 (16)  | 0 (0)  | 1 (4) |
| Item 6: Accidents<br>(number of days in<br>past week)               | Difficulty interpreting<br>chart        | 18 (72)  | 5 (20)  | 2 (8)  | 0 (0) |
|                                                                     | Able to identify<br>number from chart   | 20 (80)  | 5 (20)  | 0 (0)  | 0 (0) |
|                                                                     | Summary screen                          | 24 (96)  | 1 (4)   | 0 (0)  | 0 (0) |
| Average severity<br>of abdominal pain,<br>cramping, and<br>pressure | Chart and<br>associated<br>summary page | 12 (48)  | 10 (40) | 3 (12) | 0 (0) |
|                                                                     | Vertical axis                           | 20 (80)  | 3 (12)  | 2 (8)  | 0 (0) |
|                                                                     | Average severity<br>summary screen      | 13 (52)  | 12 (48) | 0 (0)  | 0 (0) |
| Filters (phrases)                                                   | Past week                               | 25 (100) | 0 (0)   | 0 (0)  | 0 (0) |
|                                                                     | Past month                              | 25 (100) | 0 (0)   | 0 (0)  | 0 (0) |
|                                                                     | Past 3 months                           | 24 (96)  | 0 (0)   | 1 (4)  | 0 (0) |
|                                                                     | Horizontal axis                         | 23 (92)  | 2 (8)   | 0 (0)  | 0 (0) |
